# Supplementary material
Source: Springer Nature journal article supplement (https://www.springermedizin.de/resource/supplementary/13046_2013_731_MOESM1_ESM.pdf/9662828)

**A**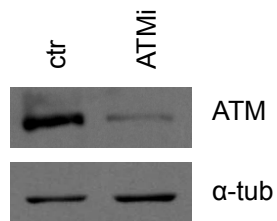**B**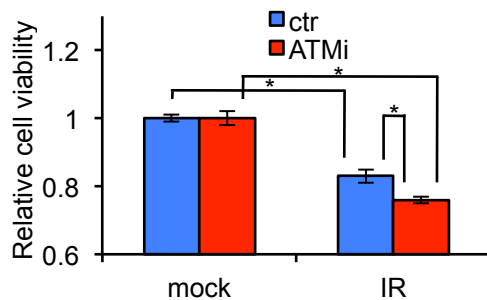**C**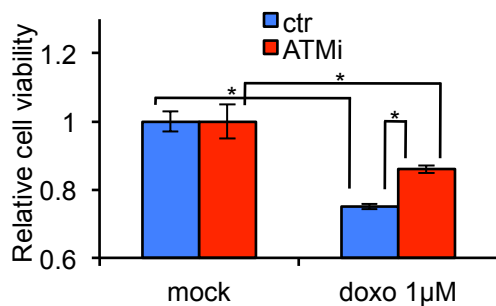**D**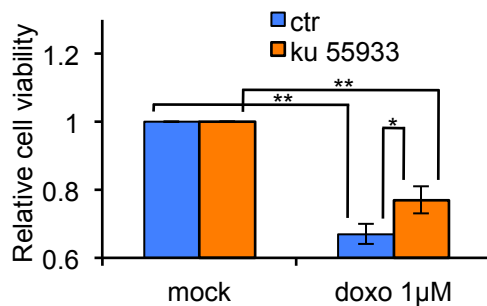**E**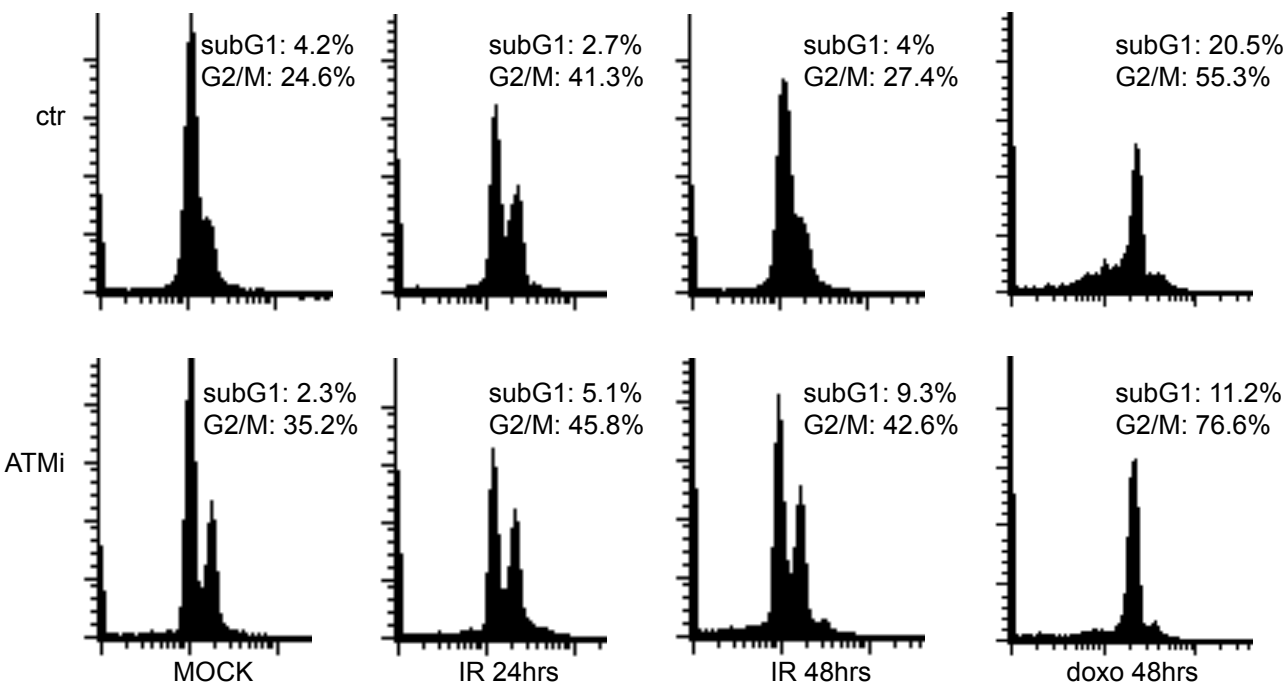

Supplement: MOESM1 [file 9662828]
